# Supplementary material for: Lipase as a Chiral Selector Immobilised on Carboxylated Single-Walled Carbon Nanotubes and Encapsulated in the Organic Polymer Monolithic Capillary for Nano-High Performance Liquid Chromatography Enantioseparation of Racemic Pharmaceuticals
Source: MDPI journal article supplement (doi:10.3390/molecules28186663), 2023-09-16
Supplement: s1 [file s1]

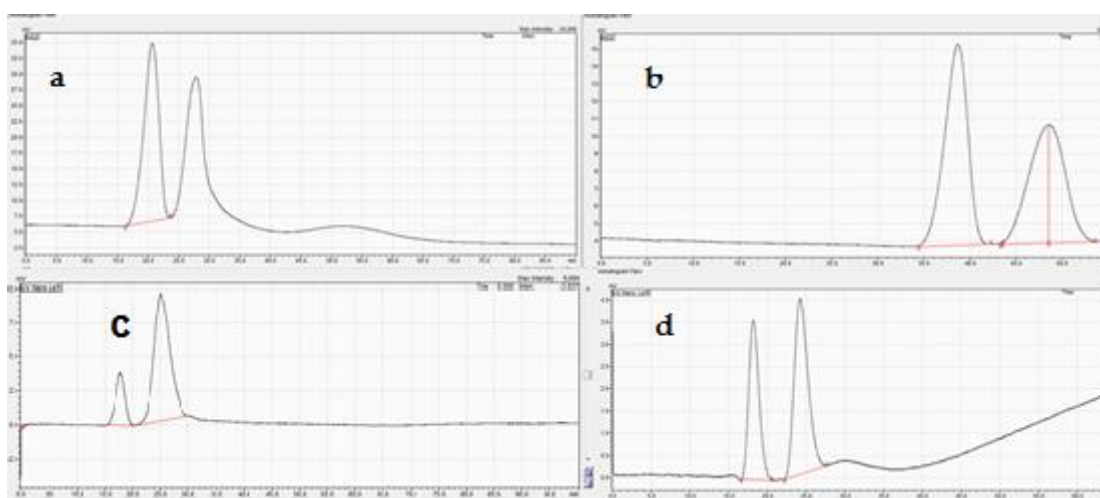

**Figure 1:** Enantioselective nano-lc separation of racemic miconazole (a) (Mobile phase: Methanol :water 10:90 v/v, atenolol (b) (Mobile phase: methanol /water 50:50 v/v, Nomifensine (c), (Mobile phase: methanol /water 10:90 v/v and Normatenphrine (d), (Mobile phase: methanol /water 80:20 v/v on L2 capillary column (150  $\mu$ m ID, 25 cm length). UV: 219 nm, flow rate: 1  $\mu$ L/min.

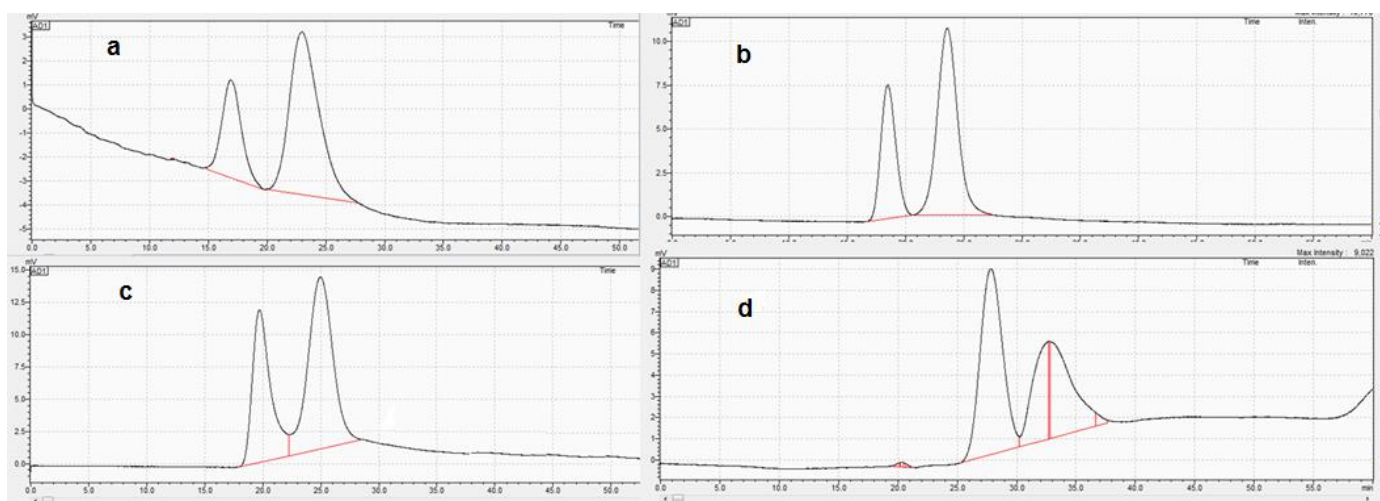

**Figure 2:** Enantioselective nano-lc separation of racemic Fluribiprofen (a) (Mobile phase: Methanol :water 50:50 v/v), Ifosfamid (b), phenylalanine (c), and Propranolol (d), (Mobile phase: methanol /water 80:20 v/v on L2 capillary column (150  $\mu$ m ID, 25 cm length). UV: 219 nm, flow rate: 1  $\mu$ L/min.

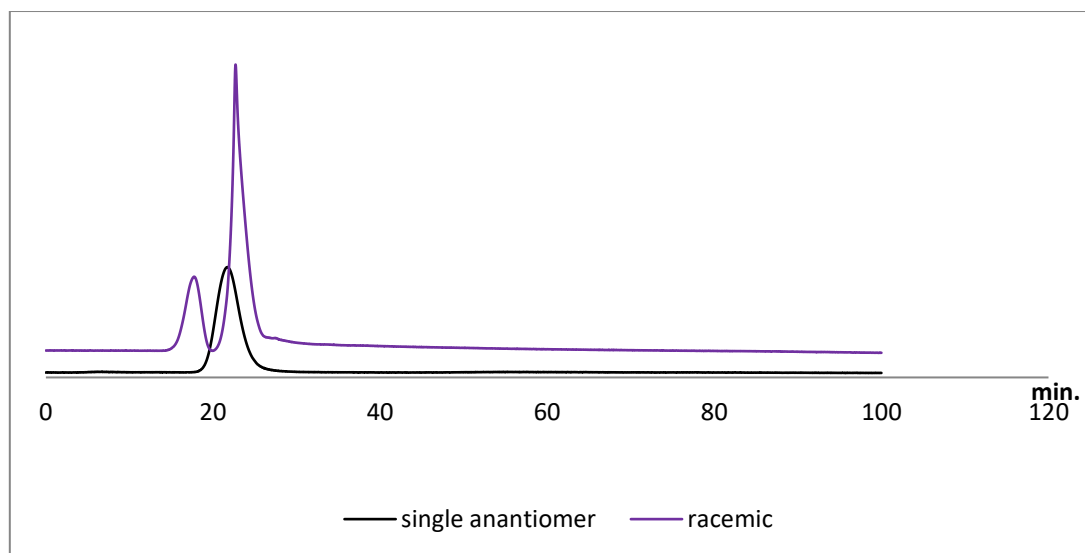

**Figure 3.** Enantioselective nano-lc separation of racemic Nomifensine on L2 capillary ( violet ) and blank capillary( black) using mobile phase: methanol /water 20:80 v/v, UV: 219 nm, flow rate: 1  $\mu$ L/min.

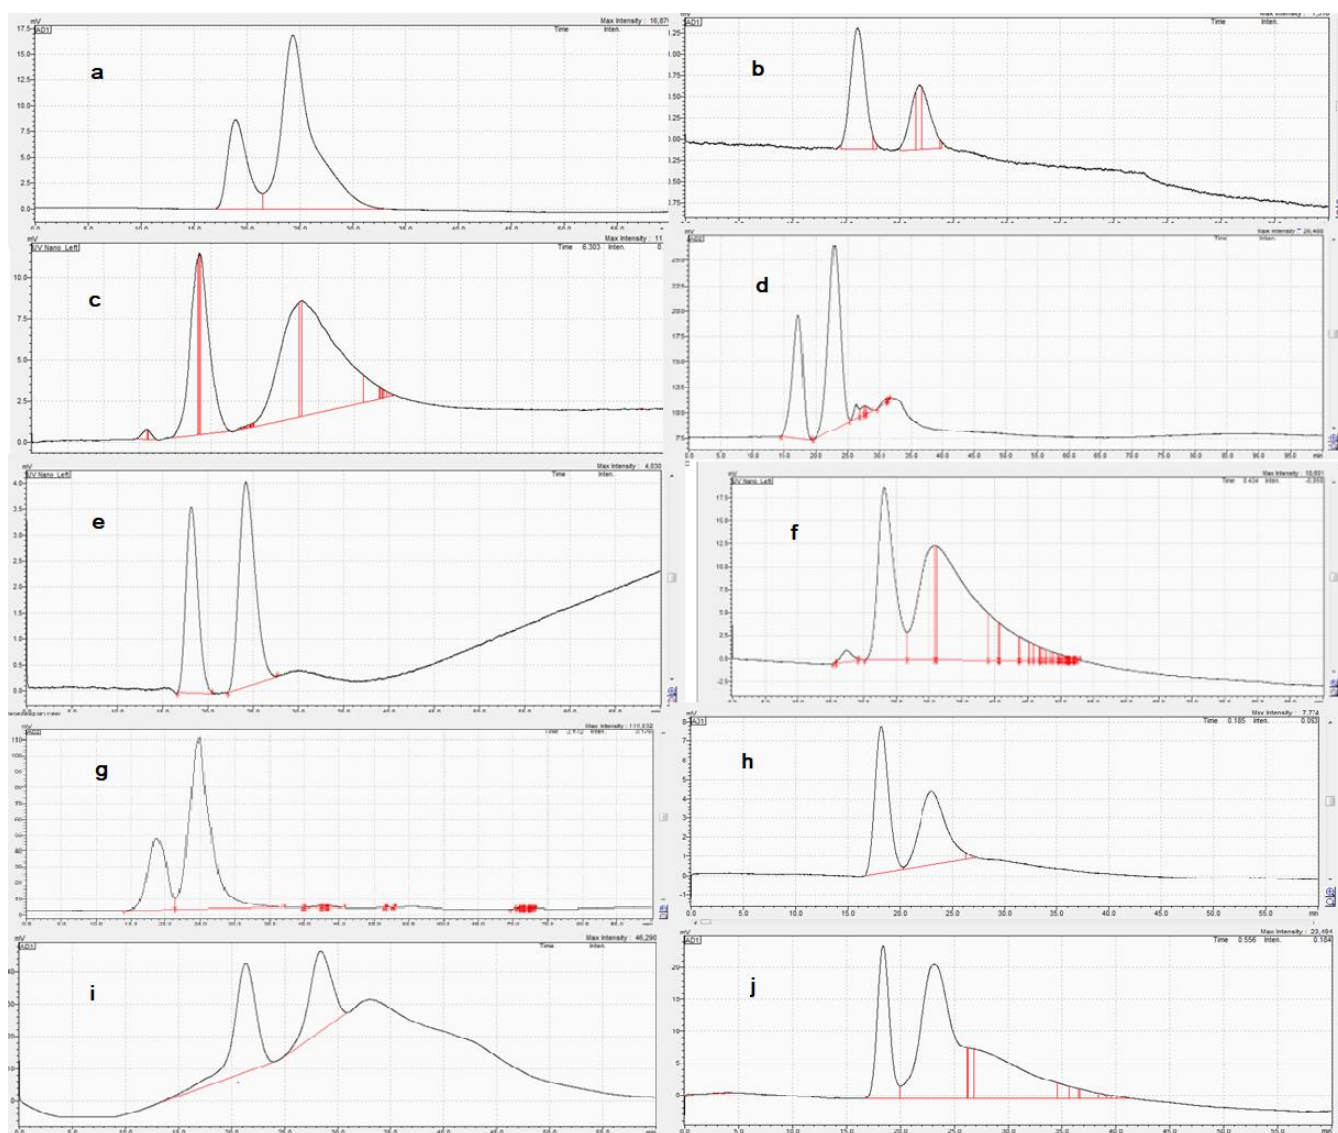

**Figure 4:** Enantioselective nano-lc separation of racemic tocainide (a), 4- hydroxy mandelic acid (b), clopidogrel (c), flavanone (d), alprenolol (e), propafenone (f), ibuprofen (g), ampicilline(h), metoprolol (i) and arternol (j) (Mobile phase: Methanol :water mixture v/v on L1 and L2 capillaries (150  $\mu$ m ID, 25 cm length). UV: 219 nm, flow rate: 1  $\mu$ L/min.

|                                                                                                                               |                                                                                                                             |                                                                                                                                |                                                                                                                                   |
|-------------------------------------------------------------------------------------------------------------------------------|-----------------------------------------------------------------------------------------------------------------------------|--------------------------------------------------------------------------------------------------------------------------------|-----------------------------------------------------------------------------------------------------------------------------------|
| 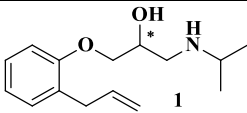 <p><b>Alprenolol</b> 1</p>                   |  <p><b>Celiprolol</b> 2</p>                |  <p><b>Atenolol</b> 3</p>                    |  <p><b>Propranolol</b> 4</p>                   |
|  <p><b>Metoprolol</b> 5</p>                   |  <p><b>Acebutolol</b> 6</p>                |  <p><b>Pindolol</b> 7</p>                    |  <p><b>Naftopidil</b> 8</p>                    |
|  <p><b>Norepinephrine</b> 9</p>               |  <p><b>Epinephrine HCl</b> 10</p>          |  <p><b>Tocainide</b> 11</p>                   |  <p><b>Mexiletine HCl</b> 12</p>               |
|  <p><b>Propafenone HCl</b> 13</p>             |  <p><b>5-Hydroxypropafenone HCl</b> 14</p> |  <p><b>Carprofen</b> 15</p>                  |  <p><b>Naftopidil</b> 16</p>                   |
|  <p><b>Cizolirtine</b> 17</p>                |  <p><b>Desmethyl cizolirtine</b> 18</p>   |  <p><b>Cizolirtine oxalate</b> 19</p>       |  <p><b>Cizolirtine citrate</b> 20</p>         |
|  <p><b>Flurbiprofen</b> 21</p>              |  <p><b>Indoprofen</b> 22</p>             |  <p><b>Ibuprofen</b> 23</p>                |  <p><b>Glafenine</b> 24</p>                  |
|  <p><b>Ampicillin</b> 25</p>                |  <p><b>Hexaconazole</b> 26</p>           |  <p><b>Miconazole</b> 27</p>               |  <p><b>Diniconazole</b> 28</p>               |
|  <p><b>Ifosfamide</b> 29</p>               |  <p><b>Normetanephrine</b> 30</p>        |  <p><b>Chlorpheniramine maleate</b> 31</p> |  <p><b>N-acetyl aminoglutethimide</b> 32</p> |
|  <p><b>Aminoglutethimide</b> 33</p>         |  <p><b>Nomifensine</b> 34</p>            |  <p><b>Tyrosine</b> 35</p>                 |  <p><b>Phenylalanine</b> 36</p>              |
|  <p><b>Glutamic acid monohydrate</b> 37</p> |  <p><b>6-Hydroxyflavone</b> 38</p>       |  <p><b>Flavone</b> 39</p>                  |  <p><b>Thalidomide</b> 40</p>                |

|                                                                                                                                 |                                                                                                                                                      |                                                                                                                        |                                                                                                                                               |
|---------------------------------------------------------------------------------------------------------------------------------|------------------------------------------------------------------------------------------------------------------------------------------------------|------------------------------------------------------------------------------------------------------------------------|-----------------------------------------------------------------------------------------------------------------------------------------------|
| 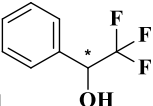 <p>41<br/>1-Phenyl-2,2,2-trifluoroethanol</p> |  <p>42<br/>5-<math>\alpha</math>-Hydroxybenzyl-1-methylpyrazole</p> |  <p>43<br/>O-Methoxymandilic acid</p> |  <p>44<br/>4-Hydroxy-3-methoxymandelic acid</p>            |
|  <p>45<br/>Nicotine</p>                        |  <p>46<br/>Cantharidin</p>                                          |  <p>47<br/>1-Acenaphthenol</p>        |  <p>48<br/>2-methyl-3-(3,4-Dihydroxyphenyl)-DL-alanine</p> |
|  <p>49<br/>1-Indanol</p>                       |  <p>50<br/>Clopidogrel</p>                                         |                                                                                                                        |                                                                                                                                               |

**Figure 5:** Chemical structures of the tested racemic compounds
